# Supplementary material for: Directing spatial disposition of ferrocene around homoadenine tetrads
Source: Royal Society of Chemistry journal article supplement (doi:10.1039/b802051e), 2008-01-01
Supplement: b802051e.pdf [file b802051e.pdf]

## Supporting information: Directing spatial disposition of ferrocene around homoadenine tetrads

Jitendra Kumar, Chandra Shekhar Purohit and  
Sandeep Verma\*

### Crystal structure refinement details for ferrocene conjugate

**1:** The compound **1** was crystallized by the slow evaporation of methanol and chloroform mixture. For the compound, X-ray data

was collected on a Bruker SMART CCD4 X-ray diffraction instrument. The crystal was solved by direct methods and refined by using full-matrix least-squares on  $F^2$  (SHELX97). The structure was expanded using Fourier techniques. All other non-hydrogen atoms were refined anisotropically. Hydrogen atoms are placed at geometrically idealized positions. The crystal data and structural refinement parameters for both the conjugates are given in **Table 1**. CCDC contains the supplementary crystallographic data for this paper with a deposition number of **CCDC 654334** for compound **1**. Copies of this information can be obtained free of charge on application to CCDC, 12 Union Road, Cambridge CB21EZ, UK. [Fax: +44-1223/336-033; E-mail: [deposit@ccdc.cam.ac.uk](mailto:deposit@ccdc.cam.ac.uk)].

### Figures:

The Figure S1 shows the formation of adenine ribbon with the help of eight intermolecular hydrogen bonding which are further interconnected with CH...O interaction thus forming a two dimensional network of adenine ribbons.

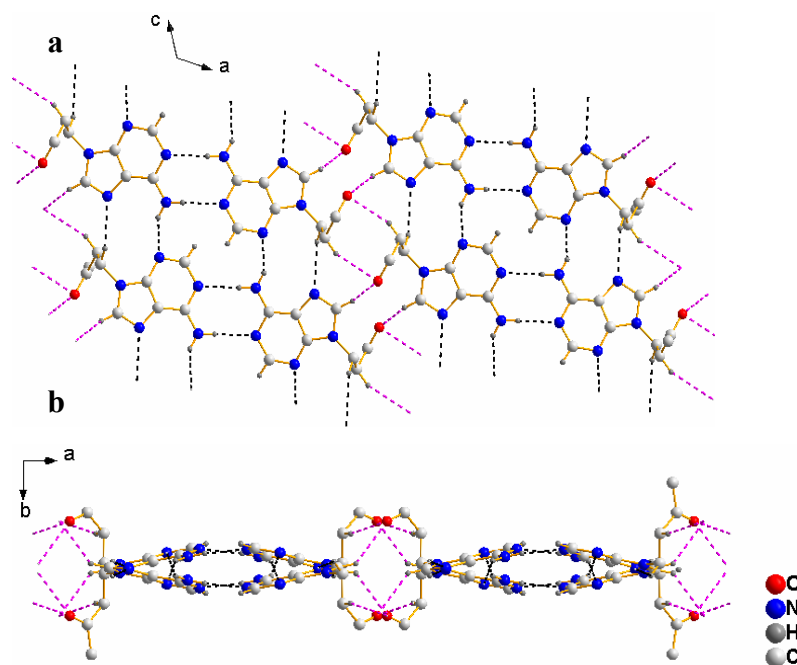

**Figure S1:** (a) Shows that the adenine ribbons are further connected to each other through CO...H hydrogen bonding forming a 2D network of adenine ribbons. (b) lateral view of the same structure (in all figures ferrocene moiety is omitted for clarity).

Figure S2 shows the different view of the crystal lattice which shows the spatial disposition of ferrocene because of hydrogen bonding interactions and  $\pi$ - $\pi$  stacking.

70

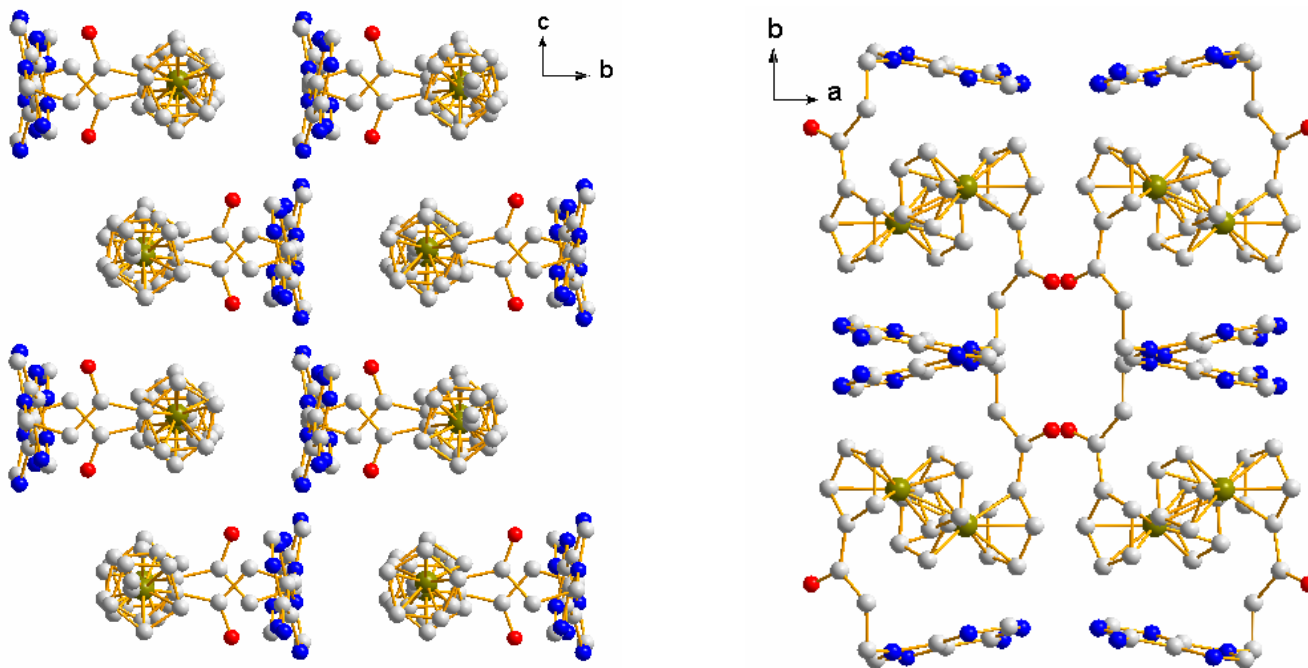

Figure S2: (a) view along a-axis, (b) view along c-axis.

75

80

85

90

95

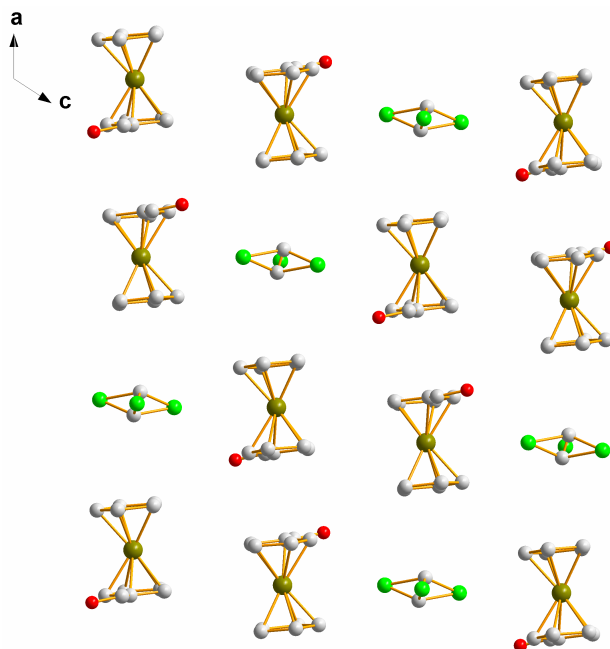

Figure S3: Linear arrangement of ferrocene units which are  $\pi$  stacked and also shows the entrapment of chloroform molecule in the crystal lattice (chloroform molecules are disordered).

100

105 **Table S1: Crystal structural refinement parameters for 1.**

|                                   |                                                                              |
|-----------------------------------|------------------------------------------------------------------------------|
| Identification code               | 1                                                                            |
| Empirical formula                 | C <sub>18.50</sub> H <sub>17.50</sub> Cl <sub>1.50</sub> Fe N <sub>5</sub> O |
| Formula weight                    | 434.90                                                                       |
| Temperature                       | 100(2) K                                                                     |
| 110 Wavelength                    | 0.71073 Å                                                                    |
| Space group                       | C 2/c                                                                        |
| a/Å                               | 18.0660(17)                                                                  |
| b/Å                               | 18.2911(17)                                                                  |
| c/Å                               | 13.0640(13)                                                                  |
| 115 α(degree)                     | 90.00                                                                        |
| β(degree)                         | 122.807(2)                                                                   |
| γ(degree)                         | 90.00                                                                        |
| Volume (Å <sup>3</sup> )          | 3628.41(56)                                                                  |
| Z, Calculated density             | 8, 1.592 mg/m <sup>3</sup>                                                   |
| 120 Absorption coefficient        | 1.072 mm <sup>-1</sup>                                                       |
| F(000)                            | 1784                                                                         |
| Crystal size                      | 0.2 × 0.2 × 0.2 mm                                                           |
| θ range                           | 2.23 to 28.29 deg.                                                           |
| Limiting indices                  | -23 ≤ h ≤ 21, -18 ≤ k ≤ 24, -17 ≤ l ≤ 17                                     |
| 125 Reflections collected/unique  | 11919/4481 [R(int) = 0.0512]                                                 |
| Completeness to theta             | = 28.29 99.5 %                                                               |
| Absorption correction             | Psi-scan                                                                     |
| Data/restraint /parameters        | 4481/ 0 / 248                                                                |
| Goodness-of-fit on F <sup>2</sup> | 1.323                                                                        |
| 130 Final R indices [I > 2σ(I)]   | R1 = 0.0555, wR2 = 0.1168                                                    |
| R indices (all data)              | R1 = 0.0827, wR2 = 0.1592                                                    |
| Largest diff. peak and hole       | 0.954 and -0.892 e.Å <sup>-3</sup>                                           |

**Table S2: Hydrogen bond distances and angles for compound 1.**

| No.                | D-H...A       | Symmetry of A | d <sub>D-H</sub> | d <sub>H...A</sub> | d <sub>D...A</sub> | #D-H...A |
|--------------------|---------------|---------------|------------------|--------------------|--------------------|----------|
| (1)                | N6-H6A...N1   | 2-x, y, 1.5-z | 0.86             | 2.13               | 2.987(6)           | 175      |
| (2)                | N6-H6B...N3   | x, -y, -0.5+z | 0.86             | 2.22               | 2.977(5)           | 146      |
| <sup>140</sup> (3) | C8-H8...O1    | 1-x, -y, 1-z  | 0.93             | 2.58               | 3.341(5)           | 139      |
| (4)                | C10-H10A...N7 | x, -y, 0.5+z  | 0.97             | 2.55               | 3.292(5)           | 133      |
| (5)                | C11-H11A...O1 | 1-x, y, 1.5-z | 0.97             | 2.58               | 3.483(5)           | 154      |

Where D=donor, A=acceptor, d=distance between atoms (in Å) and #angles are in degree.
